# Supplementary material for: Brief communication: Supraglacial debris-cover changesin the Caucasus Mountains
Source: Copernicus journal article supplement (doi:10.5194/tc-2018-259), 2019-01-09
Supplement: Supplementary file 1 [file tc-2018-259-supplement.pdf]

Supplement of

# Brief communication: Supraglacial debris-cover changes in the Caucasus Mountains

5 Levan G. Tielidze et al.

Correspondence to: Levan G. Tielidze (levan.tielidze@tsu.ge)

10 **Table S1.** Satellite images used in this study.

| Date       | UTM zone | Type of imagery | Region/Section           | Resolution | Scene ID                |
|------------|----------|-----------------|--------------------------|------------|-------------------------|
| 10/08/1985 | 37N      | Landsat 5       | Western Greater Caucasus | 30 m       | LT51720301985222XXX04   |
| 06/08/1986 | 38N      | Landsat 5       | Central Greater Caucasus | 30 m       | LT51710301986218XXX02   |
| 31/08/1986 | 38N      | Landsat 5       | Eastern Greater Caucasus | 30 m       | LT51700301986243XXX03   |
| 12/09/2000 | 37N      | Landsat 7 ETM+  | Western Greater Caucasus | 15/30 m    | LE71720302000256SGS00   |
| 05/09/2000 | 38N      | Landsat 7 ETM+  | Central Greater Caucasus | 15/30 m    | LE71710302000249SGS00   |
| 28/07/2000 | 38N      | Landsat 7 ETM+  | Eastern Greater Caucasus | 15/30 m    | LE17003020000728SGS00   |
| 23/08/2013 | 37N      | Landsat 8       | Western Greater Caucasus | 15/30 m    | LC81720302013235LGN00   |
| 03/08/2014 | 38N      | Landsat 8       | Central Greater Caucasus | 15/30 m    | LC81710302014215LGN00   |
| 28/08/2014 | 38N      | Landsat 8       | Eastern Greater Caucasus | 15/30 m    | LC81700302014240LGN00   |
| 20/08/2016 | 37N      | SPOT-7          | Elbrus                   | 1.5 m      | DS_SPOT7201608200751063 |

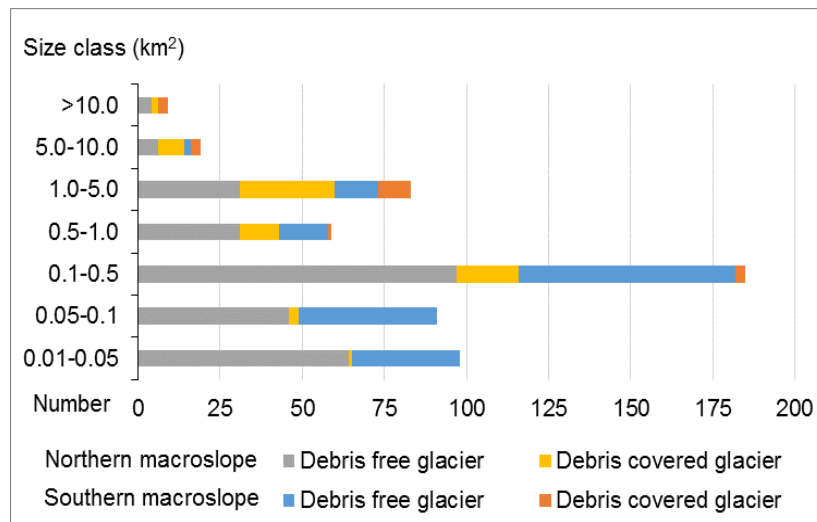

15 **Figure S1.** The Greater Caucasus glacier size classes with debris covered and debris free glaciers distributions for northern and southern slopes.

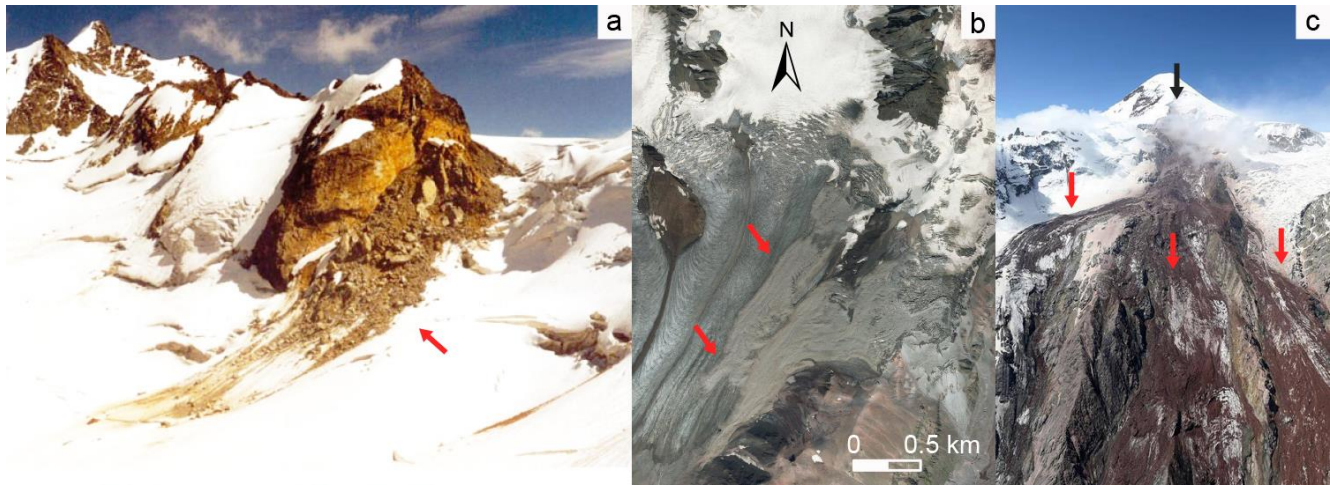

5 **Figure S2.** a – Djankuat (2001), b – Suatisi (2007, 2010), and c – Devdoraki (2014) glacier rock falls. Red arrows show the flow of the rock-ice avalanche. The black arrow shows the center of genesis of the rock-ice avalanche (4600 m asl).

10

15

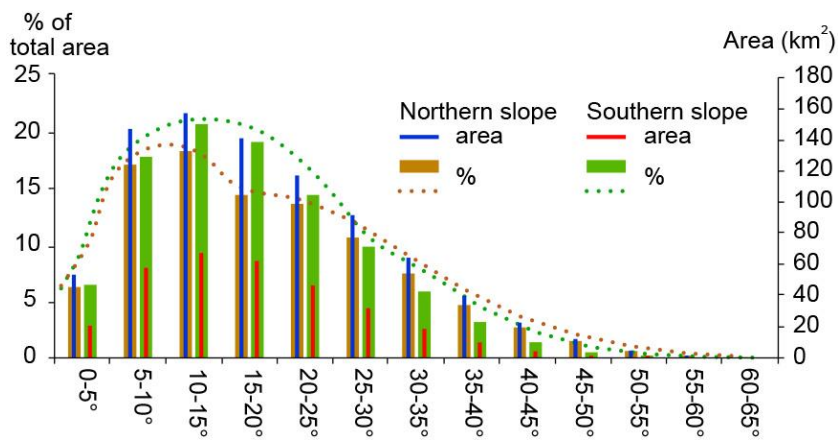

20 **Figure S3.** Greater Caucasus total glacier surface inclination for northern and southern slopes based on ASTER GDEM.

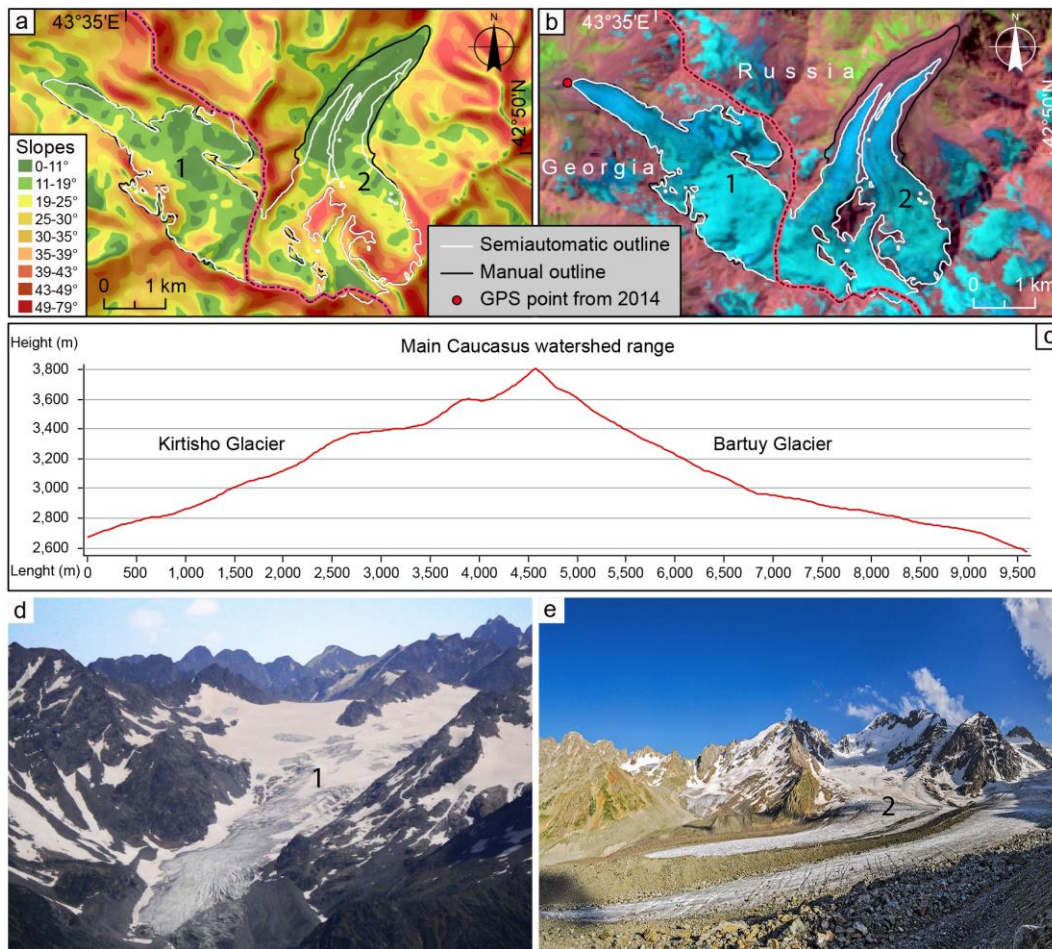

5 **Figure S4.** a1 – Kirtisho and a2 – Bartuy glaciers slope inclination map based on ASTER GDEM; (b) the manual and semi-automated outlines comparison and SDC assessment, Landsat 8 (3/08/2014); c – Kirtisho and Bartuy glaciers longitudinal profile based on ASTER GDEM; d – Kirtisho Glacier in 2010 (photo by L.G. Tielidze); e – Bartuy Glacier in 2014 (photo by M. Golubev).

10

15

20

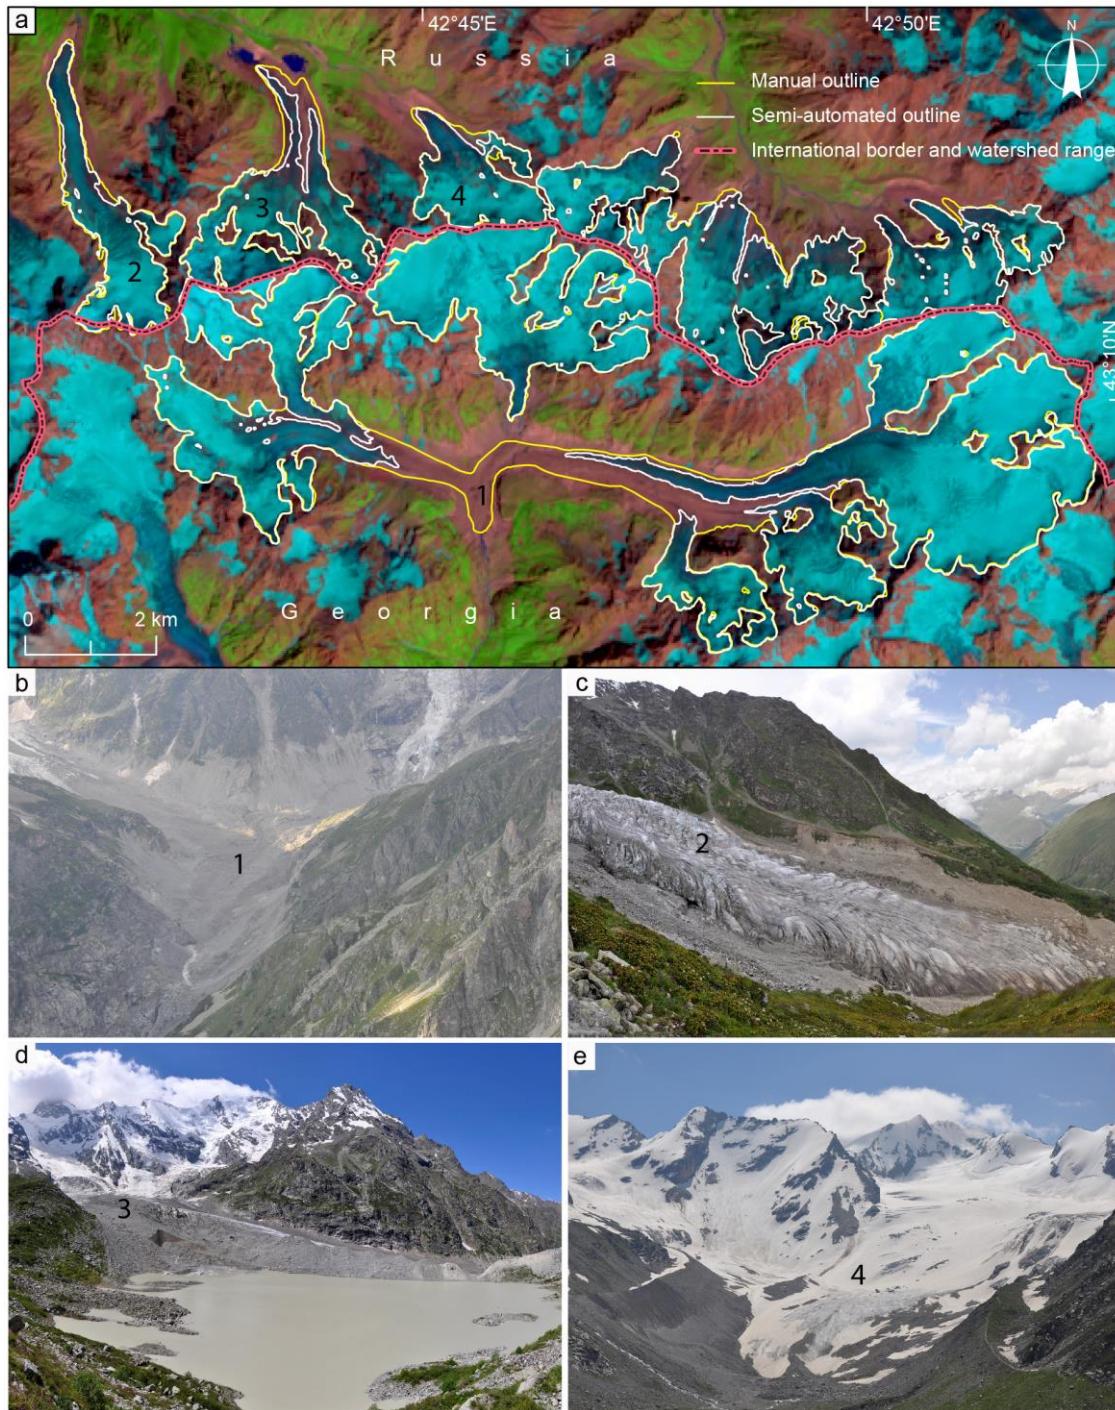

5 **Figure S5.** a – Manual and semi-automatic outlines comparison and SDC assessment for the southern (Lekhziri, a1) and northern (Kashkatash a2, Bashkara a3 and Djankuat a4 glaciers (Landsat 8 OLI 03/08/2014); b – Lekhziri Glacier tongue in 2011; c – Kashkatash Glacier tongue in 2014; d – Bashkara Glacier tongue in 2014; (e) Djankuat Glacier in 2014.

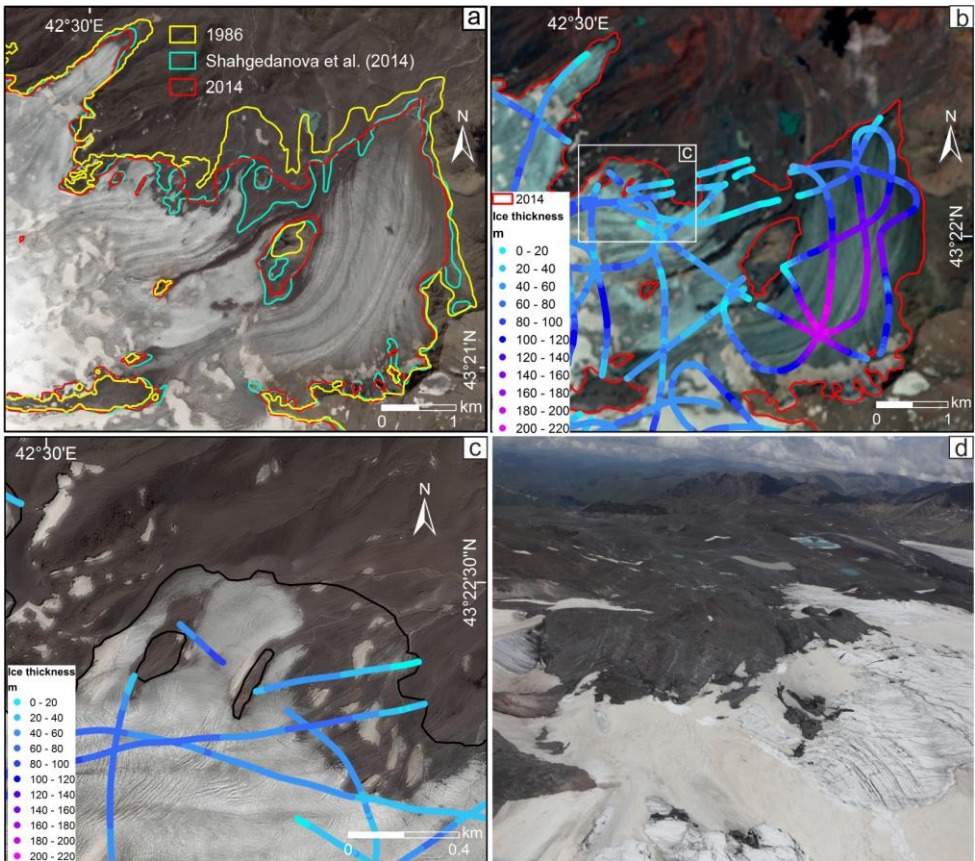

**Figure S6.** Glaciers of the eastern slope of Elbrus. a – glacier outlines of 1986 and 2014. Red outline shows glacier margins after GPR measurement. SPOT-7 image used as a background; b – Ice thickness profiles obtained during aerial GPR survey in 2014, Landsat 8 image of 2014; c – glacier outlines and ice thickness profiles with SPOT-7 high resolution image; d – oblique photograph of the glacier tongues taken from helicopter in 2014.

5

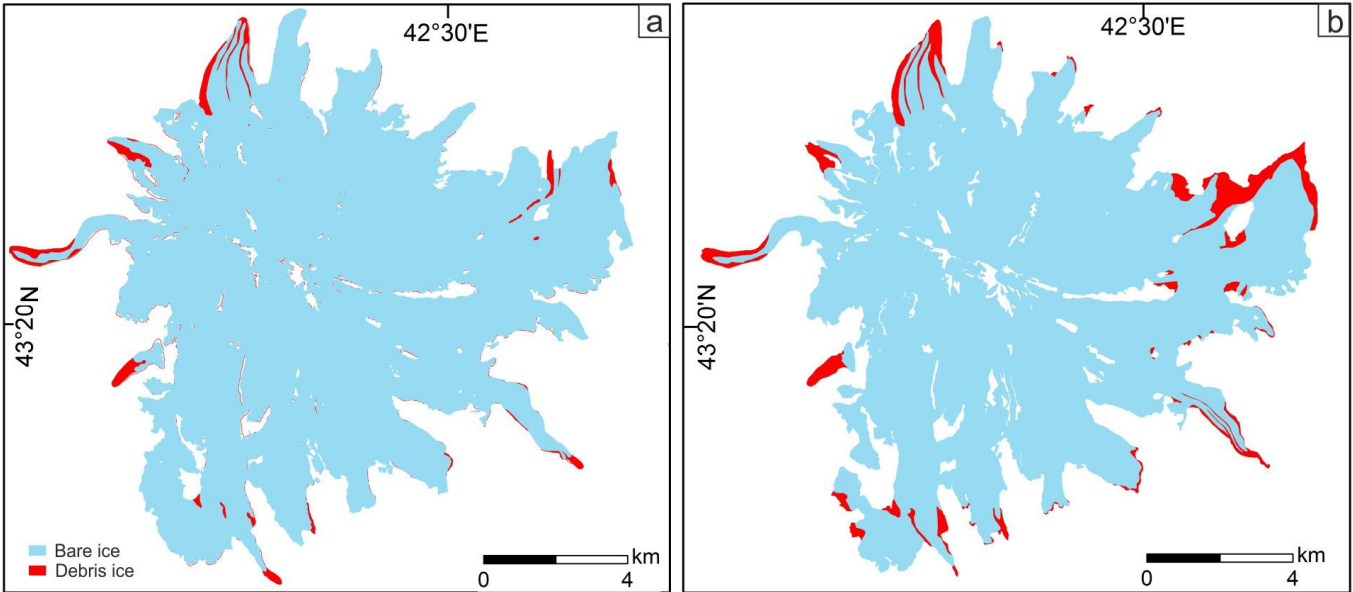

**Figure S7.** Debris cover increase on the Elbrus massif from 1986 (a) to 2014 (b).

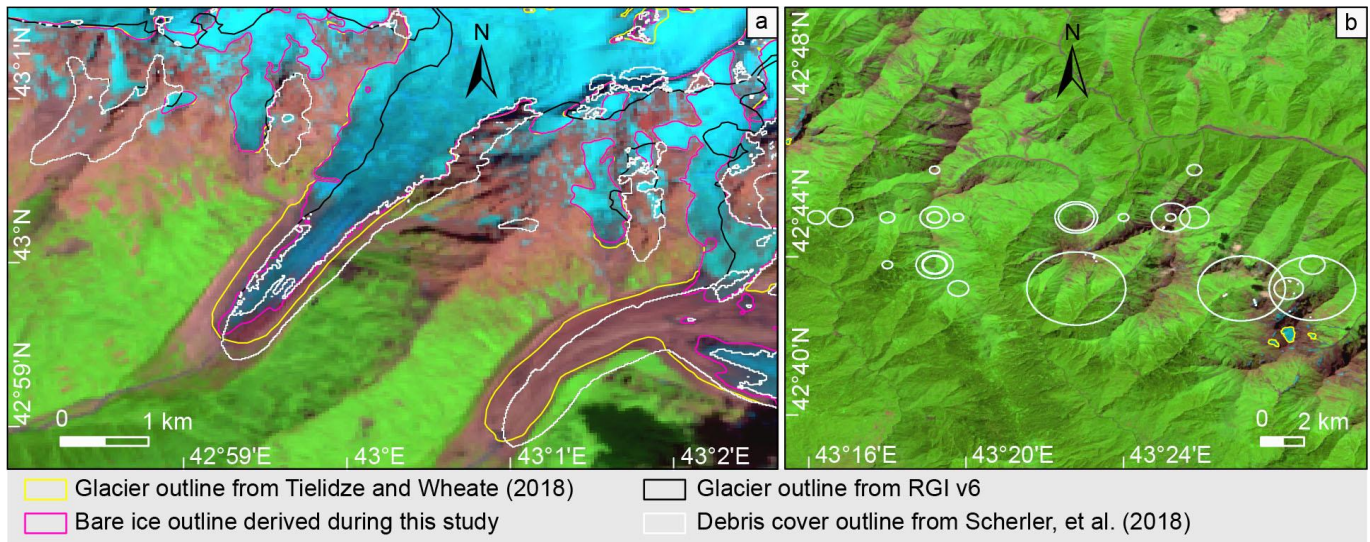

**Figure S8.** a - An example of the RGI v6 data inconsistent registration; b - An example of the RGI v6 nominal glaciers (circles). Landsat 8 image 03/08/2014 is used as the background.

5
