# Supplementary material for: Brief communication: Supraglacial debris-cover changesin the Caucasus Mountains
Source: Copernicus journal article supplement (doi:10.5194/tc-2018-259), 2019-01-09
Supplement: Supplementary file [file tc-2018-259-AC3-supplement.zip]

Supplement of

# Brief communication: Supraglacial debris-cover changes in the Caucasus Mountains

Levan G. Tielidze et al.

Correspondence to: Levan G. Tielidze (levan.tielidze@tsu.ge)

**Table S1.** Satellite images used in this study.

| Date       | UTM zone | Sensor         | Region/Section           | Resolution | Scene ID                |
|------------|----------|----------------|--------------------------|------------|-------------------------|
| 10/08/1985 | 37N      | Landsat 5 TM   | Western Greater Caucasus | 30 m       | LT51720301985222XXX04   |
| 06/08/1986 | 38N      | Landsat 5 TM   | Central Greater Caucasus | 30 m       | LT51710301986218XXX02   |
| 31/08/1986 | 38N      | Landsat 5 TM   | Eastern Greater Caucasus | 30 m       | LT51700301986243XXX03   |
| 12/09/2000 | 37N      | Landsat 7 ETM+ | Western Greater Caucasus | 15/30 m    | LE71720302000256SGS00   |
| 05/09/2000 | 38N      | Landsat 7 ETM+ | Central Greater Caucasus | 15/30 m    | LE71710302000249SGS00   |
| 28/07/2000 | 38N      | Landsat 7 ETM+ | Eastern Greater Caucasus | 15/30 m    | LE17003020000728SGS00   |
| 23/08/2013 | 37N      | Landsat 8 OLI  | Western Greater Caucasus | 15/30 m    | LC81720302013235LGN00   |
| 03/08/2014 | 38N      | Landsat 8 OLI  | Central Greater Caucasus | 15/30 m    | LC81710302014215LGN00   |
| 28/08/2014 | 38N      | Landsat 8 OLI  | Eastern Greater Caucasus | 15/30 m    | LC81700302014240LGN00   |
| 20/08/2016 | 37N      | SPOT-7         | Elbrus                   | 1.5 m      | DS_SPOT7201608200751063 |

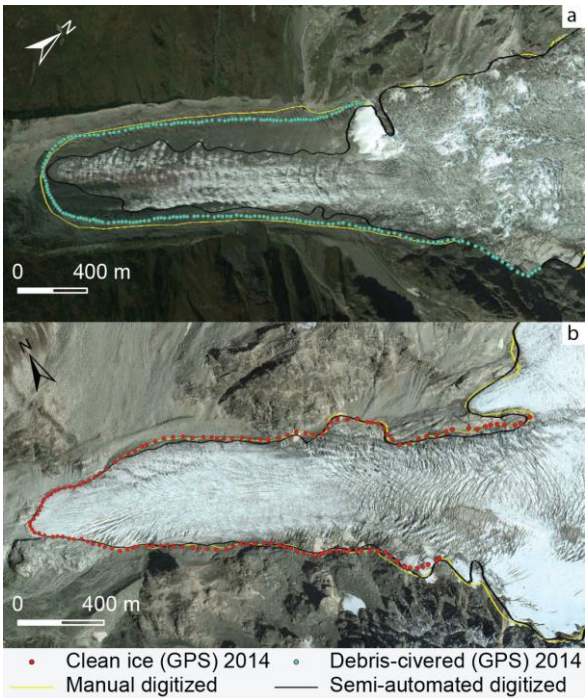

**Figure S1.** Examples of glacier outline accuracy assessment by GPS measurements: a – Adishi Glacier; b – Kirtisho Glacier. Google Earth imagery 19/09/11.

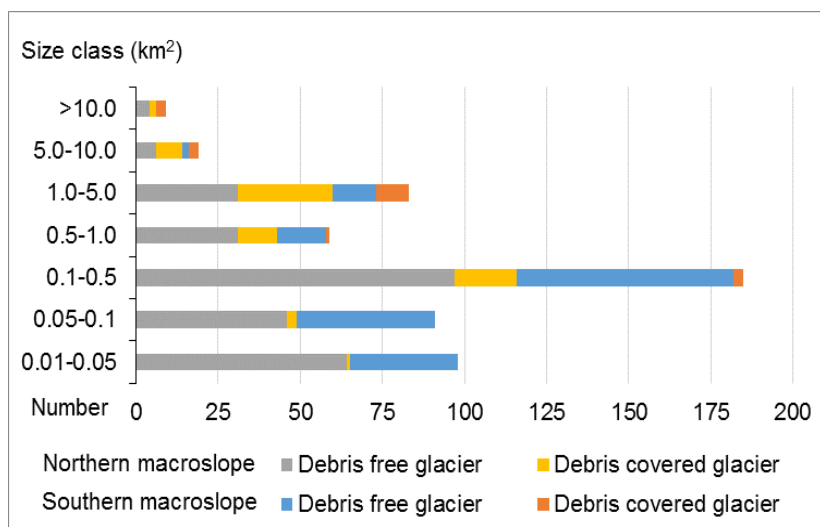

**Figure S2.** The Greater Caucasus glacier size classes with debris covered and debris free glaciers distributions for northern and southern slopes.

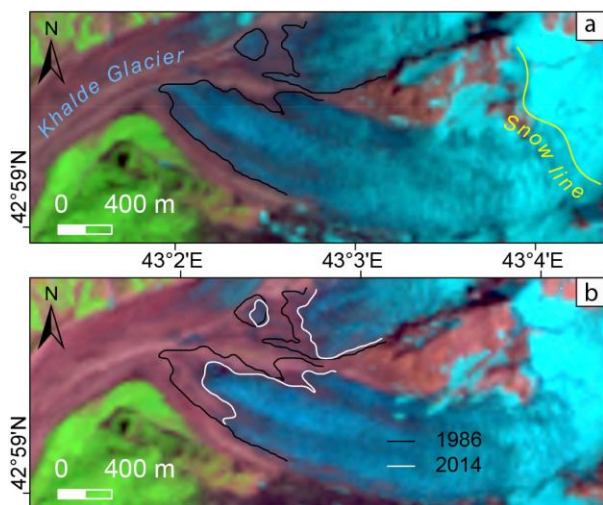

**Figure S3.** An example of the SDC up-glacier migration onto the Khalde Glacier. a – 1986 (Landsat 5, 06/08/86). b – 2014 (Landsat 8, 03/08/14).

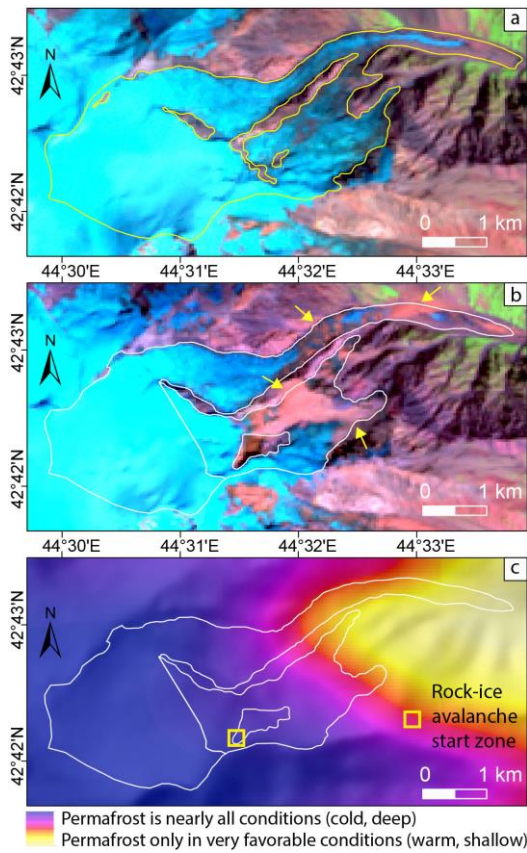

**Figure S4.** a – Devdoraki Glacier in 2000 (Landsat 7, 30/08/00); b – Devdoraki Glacier after rock-ice avalanche in 2014 (Landsat 8, 28/08/14). Yellow arrow shows increased SDC area. c – Devdoraki Glacier on the permafrost zonation index map (Gruber, 2012).

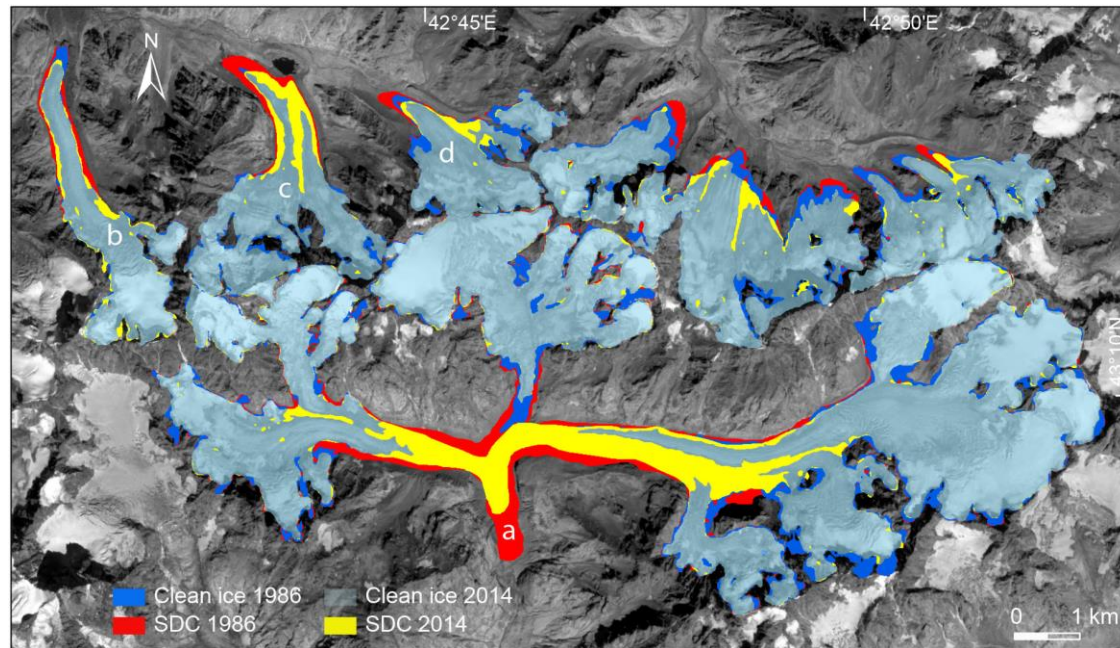

**Figure S5.** A comparison of SDC and clean-ice area distribution in 1986-2014 for the southern (a – Lekhziri) and northern (b – Kashkatash, c – Bashkara and d – Djankuat) glaciers. Landsat 8 (panchromatic band 8), 03/08/14 was used background.



1  
2

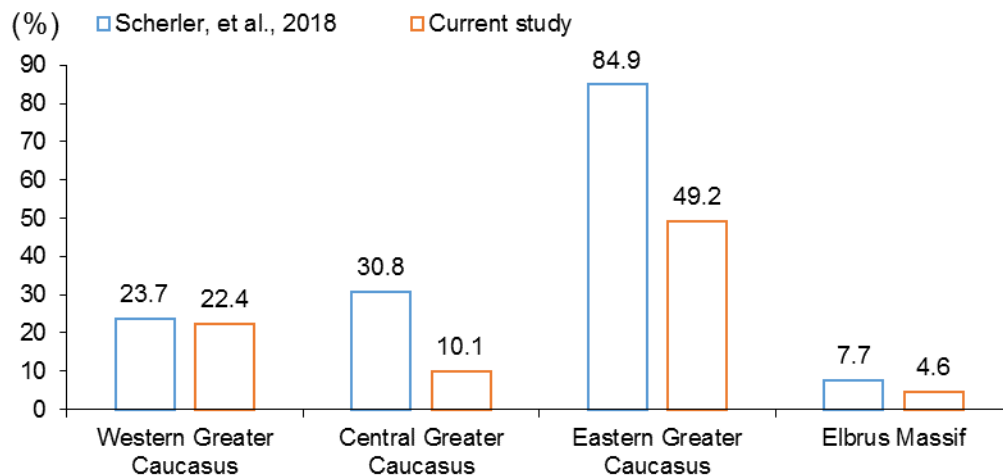

3  
4  
5  
6  
7  
8

**Figure S6.** Relative SDC for the Western, Central, and Eastern Greater Caucasus as well as for Elbrus based on the current study (brown) and in comparison with Scherler et al. (2018).

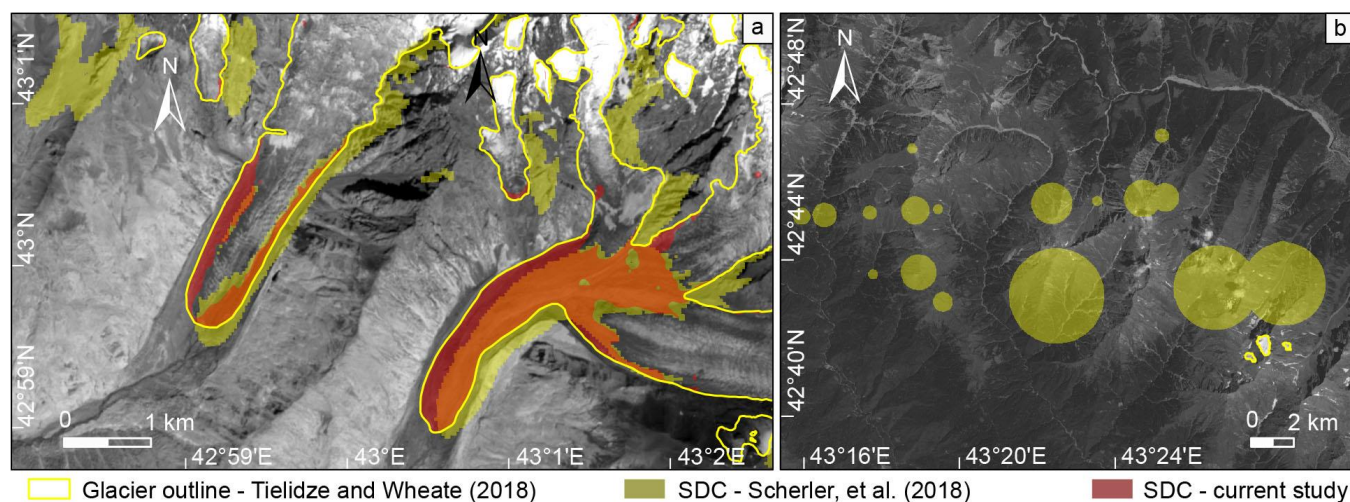

9  
10  
11  
12

**Figure S7.** a - Comparison of SDC assessment by Scherler, et al. (2018) (based the RGI v6) and current study. b - An example of the RGI v6 nominal glaciers (circles). According to Scherler, et al. (2018), all nominal glaciers were classified as debris-covered. Landsat 8 (panchromatic band 8), 03/08/14 was used background.
